# Supplementary material
Source: PubMed Central journal article supplement (PMC2629553)
Supplement: NIHMS59158-supplement-01.pdf [file NIHMS59158-supplement-01.pdf]

views or policies of the Department of Health and Human Services, nor does mention of trade names, commercial products, or organizations imply endorsement by the U.S. Government.

**Supplementary Material Available:** MALDI-TOF MS data for coupling of tetra-*N*-acetylchitotetraose to BSA under various conditions and the coupling of Man3, Man5, Man6, Man7D1, Man7D3, Man8D1D1, and Man9 to BSA. This material is available free of charge via the internet at <http://pubs.acs.org>.
